# Supplementary material for: Nanoparticulate matter exposure results in neuroinflammatory changes in the corpus callosum
Source: PLoS One. 2018 Nov 5;13(11):e0206934. doi: 10.1371/journal.pone.0206934 (PMC6218079; doi:10.1371/journal.pone.0206934)
Supplement: S1 File — (XLSX) [file pone.0206934.s001.xlsx]

## Sheet: Summary
Slice	Count	Total Area	Average Size	%Area	IntDen			AREA	0.1mm^2 COUNTING
AP FILTER NO 11 L CC Iba1.tif	23	656.166	28.529	1.472	3238.78			44576.5	51.5967				filter	nPM
AP FILTER NO 11 R CC Iba1.tif	18	604.325	33.574	1.361	3669.18			44403	40.5378	46.0672			67.3075	86.8622
AP FILTER NO 12 L CC Iba1.tif	16	606.855	37.928	1.446	4753.65			41967.8	38.1244				23.5743	9.42484
AP FILTER NO 12 R CC Iba1.tif	24	891.091	37.129	2.227	4609.05			40013.1	59.9804	49.0524				filter VS nPM
AP FILTER NO 13 L CC Iba1.tif	20	770.345	38.517	1.698	4252.75			45367.8	44.0841					0.0469513
AP FILTER NO 13 R CC Iba1.tif	33	1363.15	41.308	2.874	4750.37			47430.4	69.5757	56.8299
AP FILTER NO 14 L CC Iba1.tif	19	808.727	42.565	1.809	5695.28			44705.7	42.5001			Size
AP FILTER NO 14 R CC Iba1.tif	16	600.341	37.521	1.237	4852.85			48532	32.9679	37.734		nPM	43.7637
AP FILTER NO 15 L CC Iba1.tif	28	1250.8	44.671	2.639	5880.85			47396.8	59.0757			filter	38.2128
AP FILTER NO 15 R CC Iba1.tif	44	1731.53	39.353	4.372	5145.73			39604.9	111.097	85.0866			0.000117695
AP FILTER NO 16 L CC Iba1.tif	36	1263.24	35.09	3.366	4676.42			37529.3	95.9251
AP FILTER NO 16 R CC Iba1.tif	40	2116.43	35.274	5.173	4690.03			40913	97.7685	96.8468
AP FILTER NO 17 L CC Iba1.tif	37	2087.41	40.143	4.768	5093.43			43779.6	84.5142
AP FILTER NO 17 R CC Iba1.tif	22	880.056	40.003	2.143	5138.39			41066.5	53.5716	69.0429
AP FILTER NO 18 L CC Iba1.tif	37	1389.74	37.561	3.179	4691.07			43716.4	84.6365
AP FILTER NO 18 R CC Iba1.tif	47	1985.24	42.239	4.687	5304.13			42356.3	110.963	97.8
AP nPM NO 29 L CC Iba1.tif	29	1215.54	41.915	2.663	6701.68			45645.5	63.5331
AP nPM NO 29 R CC Iba1.tif	39	1637.53	41.988	3.73	6630.85			43901.7	88.8348	76.1839
AP nPM NO 30 L CC Iba1.tif	34	1545.7	45.462	3.62	7005.11			42698.8	79.6276
AP nPM NO 30 R CC Iba1.tif	30	1559.15	51.972	3.459	8256.89			45075.3	66.5553	73.0914
AP nPM NO 31 L CC Iba1.tif	35	1634.9	46.711	4.064	7458.75			40228.7	87.0025
AP nPM NO 31 R CC Iba1.tif	36	1485.08	41.252	3.284	6626.25			45221.7	79.6078	83.3052
AP nPM NO 32 L CC Iba1.tif	39	1213.82	41.856	2.631	6671.82			46135.2	84.5341
AP nPM NO 32 R CC Iba1.tif	40	1304.85	43.495	2.965	7113.09			44008.4	90.8917	87.7129
AP nPM NO 33 L CC Iba1.tif	32	909.933	41.361	2.16	6547.49			42126.5	75.9616
AP nPM NO 33 R CC Iba1.tif	43	1813.3	42.17	4.087	6813.73			44367.5	96.9179	86.4398
AP nPM NO 34 L CC Iba1.tif	40	1692.93	42.323	4.179	6457.57			40510.4	98.7402
AP nPM NO 34 R CC Iba1.tif	39	1658.1	42.515	3.799	6783.32			43645.6	89.356	94.0481
AP nPM NO 35 L CC Iba1.tif	36	1418.76	39.41	3.361	6180.88			42212.4	85.283
AP nPM NO 35 R CC Iba1.tif	49	2148.46	43.846	5.188	6929.03			41412.1	118.323	101.803
AP nPM NO 36 L CC Iba1.tif	48	2240.62	46.68	5.285	6966.7			42395.9	113.219
AP nPM NO 36 R CC Iba1.tif	33	1559.69	47.263	3.375	7077.53			46213.1	71.4083	92.3135
IBA-1 Density
	Area	IntDen	RawIntDen		average IntDen	average		filter	nPM
AP FILTER NO 11 L CC Iba1.tif	47982.1	6.10505e+06	113407988		127.236	126.637	mean	140.201	177.931
AP FILTER NO 11 R CC Iba1.tif	47760.3	6.01962e+06	111820978		126.038		std	7.89543	4.21279
AP FILTER NO 12 L CC Iba1.tif	43501.9	5.98773e+06	111228762		137.643	137.337	t test	1.01376e-08
AP FILTER NO 12 R CC Iba1.tif	42049.9	5.76214e+06	107038093		137.031
AP FILTER NO 13 L CC Iba1.tif	51282.1	6.68437e+06	124169576		130.345	130.766
AP FILTER NO 13 R CC Iba1.tif	49741.6	6.52543e+06	121216965		131.186
AP FILTER NO 14 L CC Iba1.tif	43293	6.43858e+06	119603636		148.721	148.376
AP FILTER NO 14 R CC Iba1.tif	52656.3	7.79479e+06	144796759		148.031
AP FILTER NO 15 L CC Iba1.tif	46461.1	6.83884e+06	127039023		147.195	145.735
AP FILTER NO 15 R CC Iba1.tif	37893.7	5.46714e+06	101558135		144.276
AP FILTER NO 16 L CC Iba1.tif	37439.7	5.52215e+06	102579983		147.495	146.595
AP FILTER NO 16 R CC Iba1.tif	36806.3	5.36252e+06	99614626		145.696
AP FILTER NO 17 L CC Iba1.tif	41692.9	5.94166e+06	110372885		142.51	143.428
AP FILTER NO 17 R CC Iba1.tif	38830.2	5.60498e+06	104118593		144.346
AP FILTER NO 18 L CC Iba1.tif	40643	5.76683e+06	107125219		141.89	142.73
AP FILTER NO 18 R CC Iba1.tif	41453.5	5.95146e+06	110554888		143.57
AP nPM NO 29 L CC Iba1.tif	45080.6	7.934e+06	147382738		175.996	177.101
AP nPM NO 29 R CC Iba1.tif	45994.3	8.19644e+06	152257836		178.206
AP nPM NO 30 L CC Iba1.tif	38799	6.91644e+06	128480427		178.263	179.498
AP nPM NO 30 R CC Iba1.tif	43001.9	7.77182e+06	144370172		180.732
AP nPM NO 31 L CC Iba1.tif	40305.3	7.2253e+06	134217831		179.264	179.74
AP nPM NO 31 R CC Iba1.tif	41479	7.47522e+06	138860344		180.217
AP nPM NO 32 L CC Iba1.tif	42335.3	7.6142e+06	141442224		179.855	181.16
AP nPM NO 32 R CC Iba1.tif	38416.2	7.00964e+06	130211744		182.466
AP nPM NO 33 L CC Iba1.tif	39636.6	7.18607e+06	133489071		181.299	181.841
AP nPM NO 33 R CC Iba1.tif	41229.3	7.51951e+06	139683088		182.383
AP nPM NO 34 L CC Iba1.tif	37484.2	6.44673e+06	119755029		171.985	175.165
AP nPM NO 34 R CC Iba1.tif	36983.8	6.59585e+06	122525119		178.344
AP nPM NO 35 L CC Iba1.tif	43550	7.84875e+06	145799094		180.224	179.969
AP nPM NO 35 R CC Iba1.tif	42526.3	7.64262e+06	141970000		179.715
AP nPM NO 36 L CC Iba1.tif	40722.9	6.81971e+06	126683528		167.466	168.97
AP nPM NO 36 R CC Iba1.tif	47441.4	8.08755e+06	150235166		170.475
